# Supplementary material
Source: publisher figshare collection journal article supplement (https://tandf.figshare.com/ndownloader/files/22715267)
Supplement: Supplementary file 1 [file 22715267]

Supplemental Data

Disclination Network Morphologies in Blue Phase III

Michiko Yamaguchi, Kenji Shimizu, Masanobu Sagisaka and

Atsushi Yoshizawa*

Department of Frontier Materials Chemistry, Graduate School of Science and Technology, Hirosaki University, 3 Bunkyo-cho, Hirosaki, Aomori 036-8561, Japan

E-mail: ayoshiza@hirosaki-u.ac.jp

Figure S1. Electric-field dependence of transmittance for the forward and backward processes in the PS-BPIII of sample **B3** at 25 °C. Optical transmittance was observed as a function of the AC field at a frequency of 2 Hz.

Figure S2. Photomicrographs of BPs of samples **A1**, **A3**, **B1** and **B2** on a glass slide with a cover slip before polymerization (scale bar 100 µm). (a) Cubic BP of sample **A1** at 66.0 °C. (b) Cubic BP of sample **A3** at 63.3 °C. (c) BPIII of sample **B1** at 44.0 °C. (d) BPIII of sample **B2** at 42.0 °C.

Figure S1. Electric-field dependence of transmittance for the forward and backward processes in the PS-BPIII of sample **B3** at 25 °C. Optical transmittance was observed as a function of the AC field at a frequency of 2 Hz.


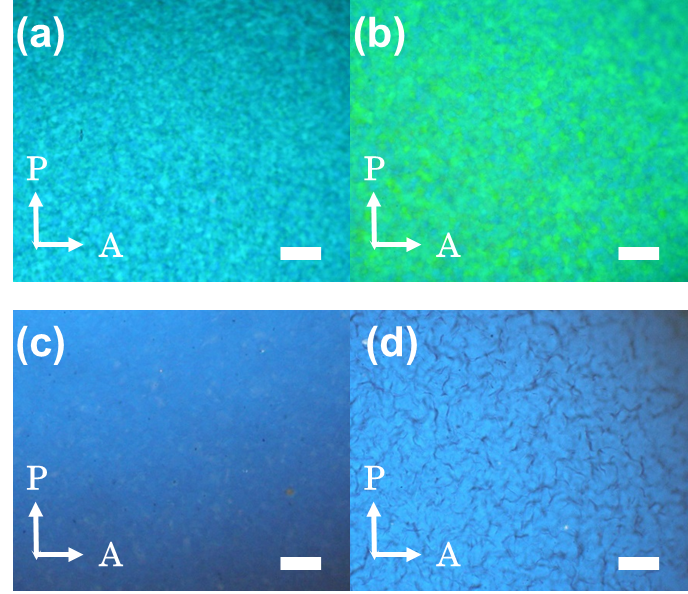


Figure S2. Photomicrographs of BPs of samples **A1**, **A3**, **B1** and **B2** on a glass slide with a cover slip before polymerization (scale bar 100 µm). (a) Cubic BP of sample **A1** at 66.0 °C. (b) Cubic BP of sample **A3** at 63.3 °C. (c) BPIII of sample **B1** at 44.0 °C. (d) BPIII of sample **B2** at 42.0 °C.
